# Supplementary material for: New strategy toward enhanced air electrode for Li–air batteries: apply a polydopamine coating and dissolved catalyst
Source: Royal Society of Chemistry journal article supplement (doi:10.1039/c4ra01015a), 2014-01-01
Supplement: c4ra01015a1.pdf [file c4ra01015a1.pdf]

## Supplementary Information

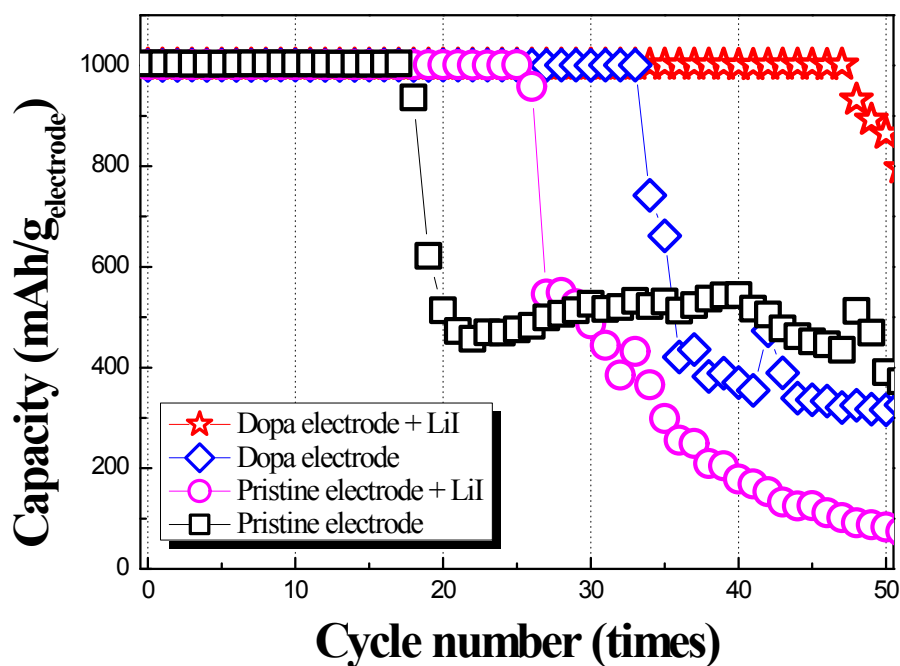

Figure S1 : Cyclic performance of the pristine and dopa electrodes at a current density of 1000 mA·g<sup>-1</sup>, measured using plain and LiI-containing electrolytes.

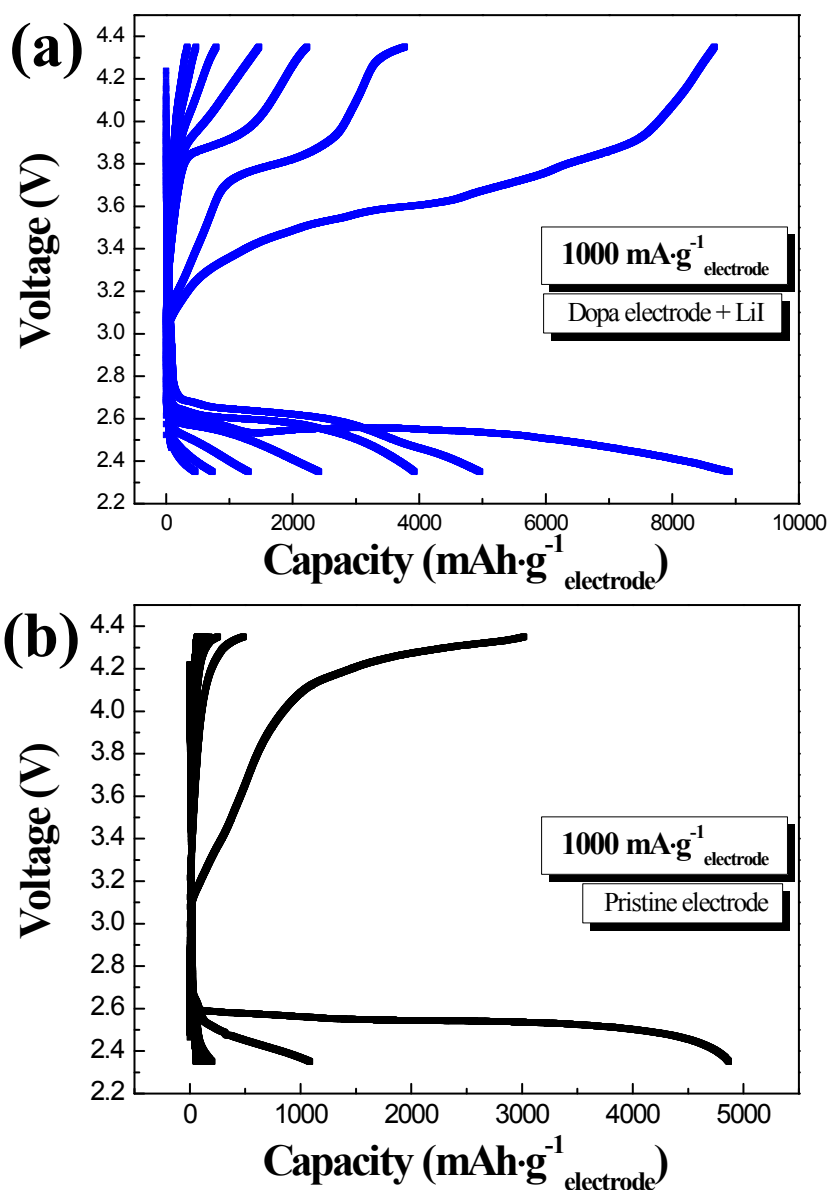

Figure S2 : Cyclic performance of the electrodes measured with full depth of discharge (current density of  $1000 \text{ mA}\cdot\text{g}^{-1}$ ). (a) Dopa electrode measured using LiI containing electrolyte; (b) pristine electrode measured using pristine electrolyte
